# Supplementary material
Source: publisher figshare collection journal article supplement (https://acs.figshare.com/ndownloader/files/3610746)
Supplement: Supplementary file 1 [file 3610746]

# Ultrahigh-resolution Total Correlation NMR Spectroscopy

## Supporting Information

Mohammadali Foroozandeh, Ralph W. Adams, Mathias Nilsson and Gareth A. Morris\*

All experimental spectra were recorded at a nominal temperature of 298 K on a Bruker Avance II+ 500 MHz spectrometer with a 5 mm BBO probe equipped with a z-gradient coil with a maximum nominal gradient strength of 53 G cm<sup>-1</sup>. G<sub>1</sub>, G<sub>2</sub>, G<sub>3</sub>, G<sub>4</sub> and G<sub>5</sub> are field gradient pulses with half sine shapes. Gradient pulses G<sub>1</sub> and G<sub>2</sub> are used for selection of desired coherence transfer pathways (CTP) and had amplitudes of 24 G cm<sup>-1</sup> and 38 G cm<sup>-1</sup> respectively and duration of 2.5 ms each. Gradient pulse G<sub>3</sub> is aligned with the center of the two chirp pulses and had an amplitude of 0.75 G cm<sup>-1</sup>. Gradient pulses G<sub>4</sub> are applied to dephase zero quantum coherences and had an amplitude of 1.5 G cm<sup>-1</sup>. Gradient pulse G<sub>5</sub> is a spoil pulse and had an amplitude of 12 G cm<sup>-1</sup>.  $\Phi_1=x,-x$ ,  $\Phi_2=x$ ,  $\Phi_3=\Phi_4=x,x,-x,-x,y,y,-y,-y$ ,  $\Phi_5=\Phi_6=\Phi_7=\Phi_8=x$  and  $\Phi_{rec}=x,-x,-x,x,x,-x,-x,x$ . Number of transients was set to 8, TD and TD1 were set to 2048, and SW and SW1 were set to 5000 Hz, in a total experiment time of 9 h.

### Generation of Chirp pulses

Chirp pulse elements used in the PSYCHE pulse sequence were generated and integrated in the Shape Tool of Topspin software version 2.1. The two chirp pulses in the double chirp element were generated with the following parameters:

Size of Shape: 10000

Total Sweep-Width: 10000 Hz

Length of Pulse: 15000

% to be smoothed: 20 %

Q (for the middle of shape): 5.0

For the low-to-high pulse, the first option box (Low to High Field) was checked, while for the high-to-low pulse it was unchecked. Pulse elements Low-to-High/ High-to-Low and High-to-Low/Low-to-High were generated by concatenating the text files of individual pulses. The mixed pulse, which sweeps frequencies from low-to-high and high-to-low field simultaneously, was generated by using the Add Shape option in the Manipulate menu of Shape Tool, or by the command “manipul addshape”, aligning at the centre and rescaling the amplitude to 100 %.

### Calibration of Chirp pulses with small flip angle

The chirp pulses used may be generated by using the spectrometer software to calculate an adiabatic inversion (180°) pulse and then reducing the radiofrequency (RF) power. To find the RF field strength ( $\gamma B_1/2\pi$ ) needed to generate a PSYCHE chirp pulse element of flip angle  $\beta$ , the RF field ( $\gamma B_{1(max)}/2\pi$ ) for a 180° rotation is first calculated by integrating the pulse as an adiabatic shape via the Analysis menu of Bruker Shape Tool, or by using the command “analyze integradia”. For the pulse used here, with a duration,  $\tau_p$ , of 15 ms, a sweep-width,  $\Delta F$ , of 10 kHz, and an adiabaticity factor,  $Q$ , of 5, an RF field of 728 Hz is obtained for  $\gamma B_{1(max)}/2\pi$ .  $\gamma B_{1(max)}/2\pi$  can also be calculated using Equation S1:

$$\frac{\gamma B_{1(max)}}{2\pi} = \frac{\sqrt{(\tau_p \times \Delta F \times Q/2\pi)}}{\tau_p} \quad \text{Equation S1}$$

The relationship between flip angle and RF field strength for a chirp pulse of this shape but different amplitudes is illustrated in Figure S9. As shown in Figure S9b, there is an approximately linear relationship between the desired flip angle and the RF amplitude of the chirp pulse for flip angles in the range 0° – 45°. For a given flip angle, the RF field strength required with the pulse shape described is given by Equation S2. For example, the PSYCHE chirp elements used in this work, with a flip angle of 20°, were obtained by reducing the RF field used for a chirp 180° pulse by a factor of 16, corresponding to an addition of 24 dB to the power attenuation of the shaped pulse.

$$\frac{\gamma B_{1(\beta)}}{2\pi} = 2.27 \times \beta$$

Equation S2

where  $\beta$  is in degrees and the LHS in Hz.

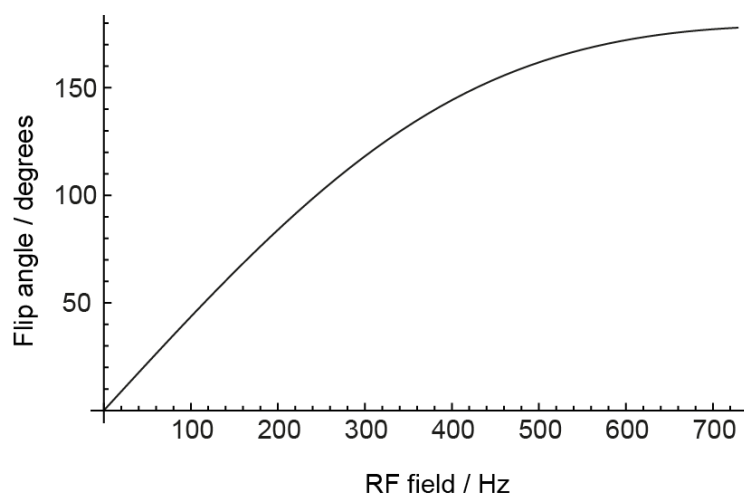

**Figure S1.** Graph illustrating the relationship between the flip angle (in degrees) and the RF field (in Hz) of the shaped pulse used in the PSYCHE chirp pulse element.

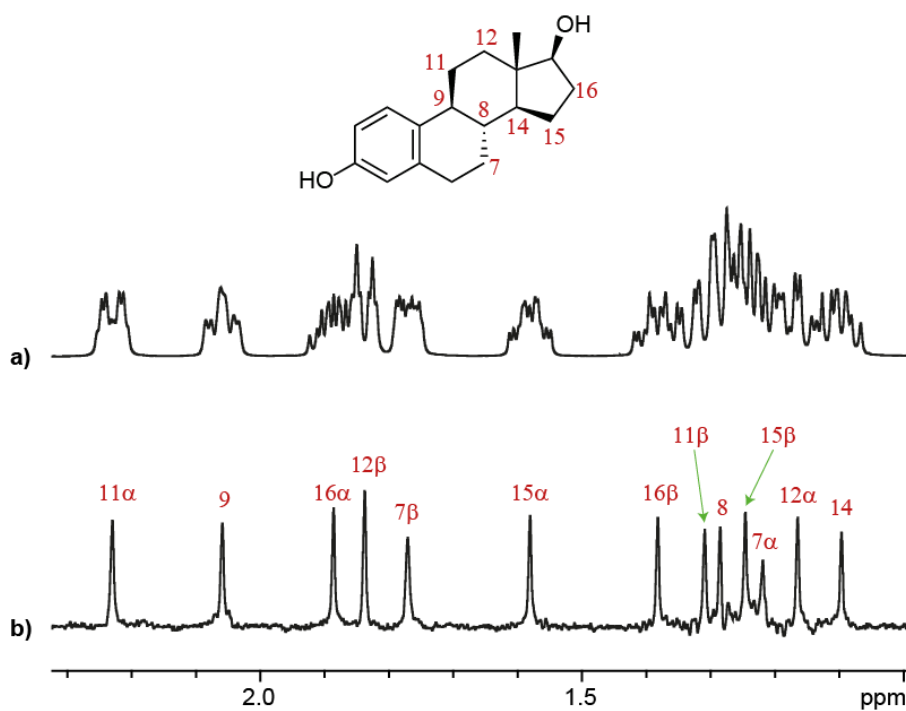

**Figure S2.** (a) Conventional 1D <sup>1</sup>H spectrum, and (b) 1D pure shift spectrum obtained by PSYCHE of a sample of estradiol (scheme) in DMSO-*d*<sub>6</sub>. The assignments are given above the peaks in (b).

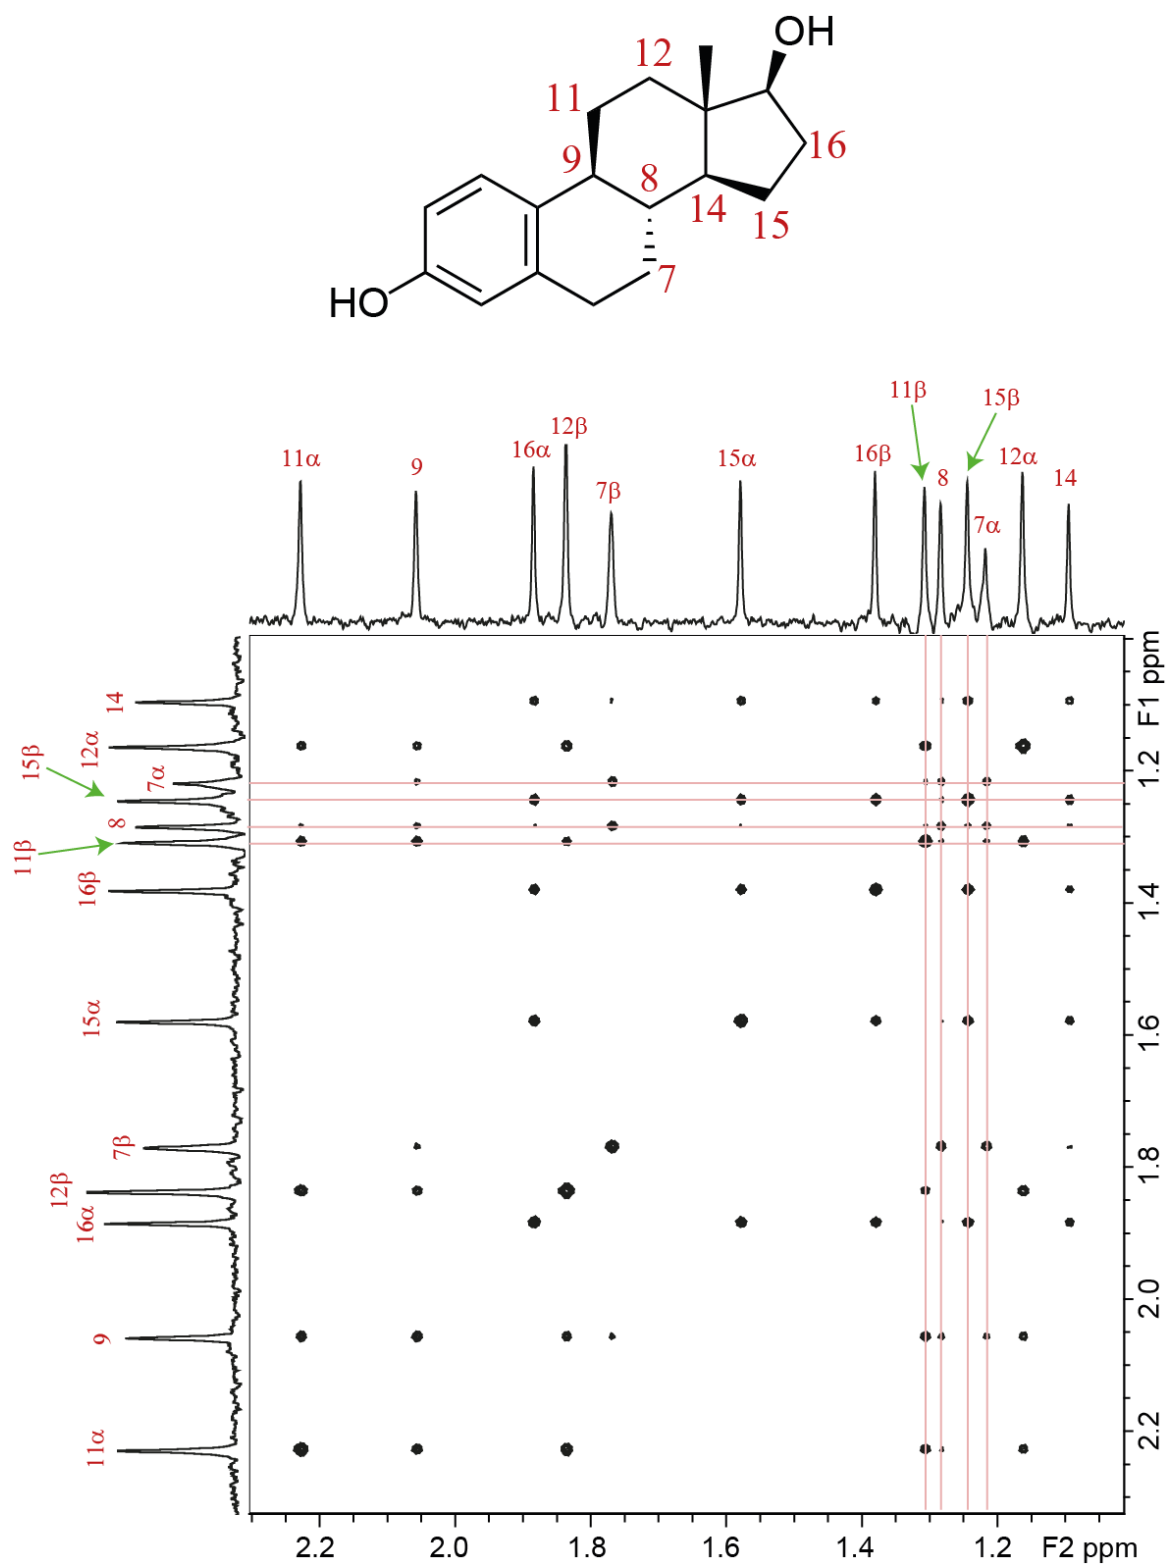

**Figure S3.** Assignments for signals in the region shown in Figure 2c in the manuscript of a sample of estradiol (scheme) in  $\text{DMSO}-d_6$ . Red lines are used to facilitate the tracking of connectivities.

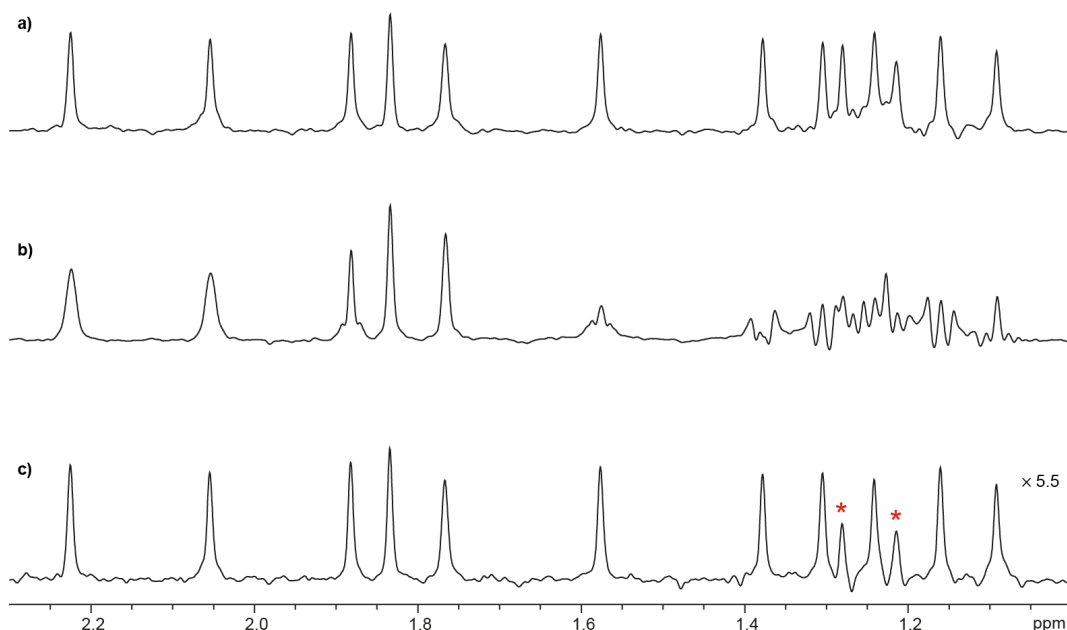

**Figure S4.** 1D  $^1\text{H}$  spectra of a sample of estradiol in  $\text{DMSO-}d_6$ , obtained (a) with PSYCHE, (b) with, ZS using a 12 ms rsnob refocusing pulse, and (c) using ZS with a 50 ms rsnob refocusing pulse. In (c), ZS approaches PSYCHE in terms of cleanliness, albeit at a cost in sensitivity, but the selectivity of the refocusing pulse is still not enough to decouple the signals marked with red asterisks. 50 ms pulses were used in pseudo-3D  $F_2$ -PSYCHE-TOCSY and  $F_2$ -ZS-TOCSY for comparison with  $F_1$ -PSYCHE-TOCSY. (Figure S7)

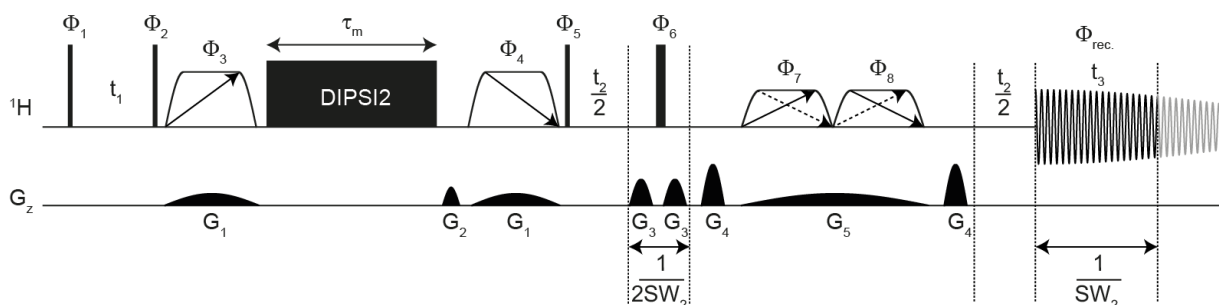

**Figure S5.** Pulse sequence for  $F_2$ -PSYCHE-TOCSY.  $90^\circ$  and  $180^\circ$  RF pulses are represented by narrow and wide rectangles respectively. Low-power chirp pulses with flip angle  $\beta$  are represented by trapezoids with cross-diagonal arrows. In this work each of the low-power chirp pulses has a frequency sweep in opposite directions simultaneously, a duration of 15 ms, an RF amplitude of 46 Hz, and a flip angle of  $20^\circ$ . Trapezoids either side of the mixing element (DIPS12) are  $180^\circ$  chirp pulses of 30 ms duration and 894 Hz amplitude, to suppress zero quantum coherences.  $G_1$ ,  $G_2$ ,  $G_3$ ,  $G_4$  and  $G_5$  are field gradient pulses with half-sine shapes. Gradient pulses  $G_1$  are applied to dephase zero quantum coherences and had an amplitude of  $1.5 \text{ G cm}^{-1}$ . Gradient pulse  $G_2$  is a spoil gradient and had an amplitude of  $12 \text{ G cm}^{-1}$ . Gradient pulses  $G_3$  and  $G_4$  are used for selection of desired coherence transfer pathways (CTP) and had amplitudes of  $24 \text{ G cm}^{-1}$  and  $38 \text{ G cm}^{-1}$  respectively and duration of 2.5 ms each. Gradient pulse  $G_5$  was aligned with the center of the PSYCHE low-power chirp pulse element and had an amplitude of  $0.75 \text{ G cm}^{-1}$ . Pulse phases:  $\Phi_1=x, -x$ ,  $\Phi_2=\Phi_3=\Phi_4=\Phi_5=\Phi_6=x$ ,  $\Phi_7=\Phi_8= x, x, -x, -x, y, y, -y, -y$ , and  $\Phi_{\text{rec}}=x, -x, -x, x, x, -x, -x, x$  were used. For the  $F_2$ -ZS-TOCSY the double-chirp element was replaced by an rsnob refocusing pulse and gradient pulse  $G_5$  had rectangular shape. Rsnob pulses had either 12 ms duration with RF amplitude of 195 Hz or 50 ms duration with RF amplitude of 47 Hz, as noted in text.

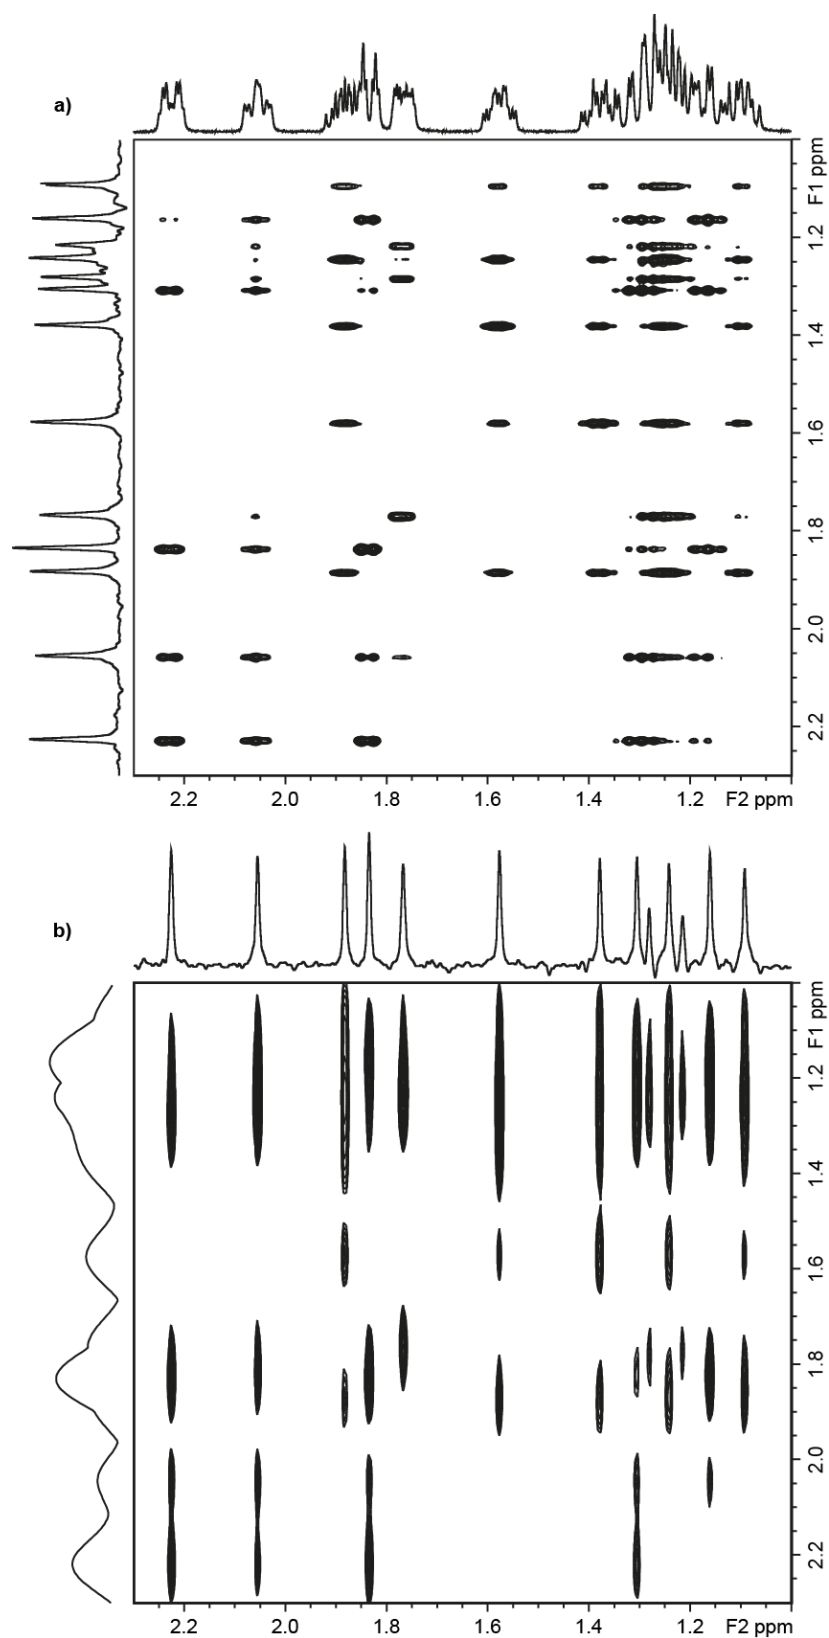

**Figure S6.** (a) 2D  $F_1$ -PSYCHE-TOCSY spectrum and (b) reconstructed 2D  $F_2$ -ZS-TOCSY spectrum of a sample of estradiol in DMSO- $d_6$ . For (a) the PSYCHE element had the same settings as described in figure S5. For (b) the rsnob pulse had duration of 50 ms and RF amplitude of 47 Hz. For the same experiment time (9 h) the  $F_1$ -PSYCHE-TOCSY experiment had 2048 points in  $F_1$  while  $F_2$ -ZS-TOCSY had 128 points.

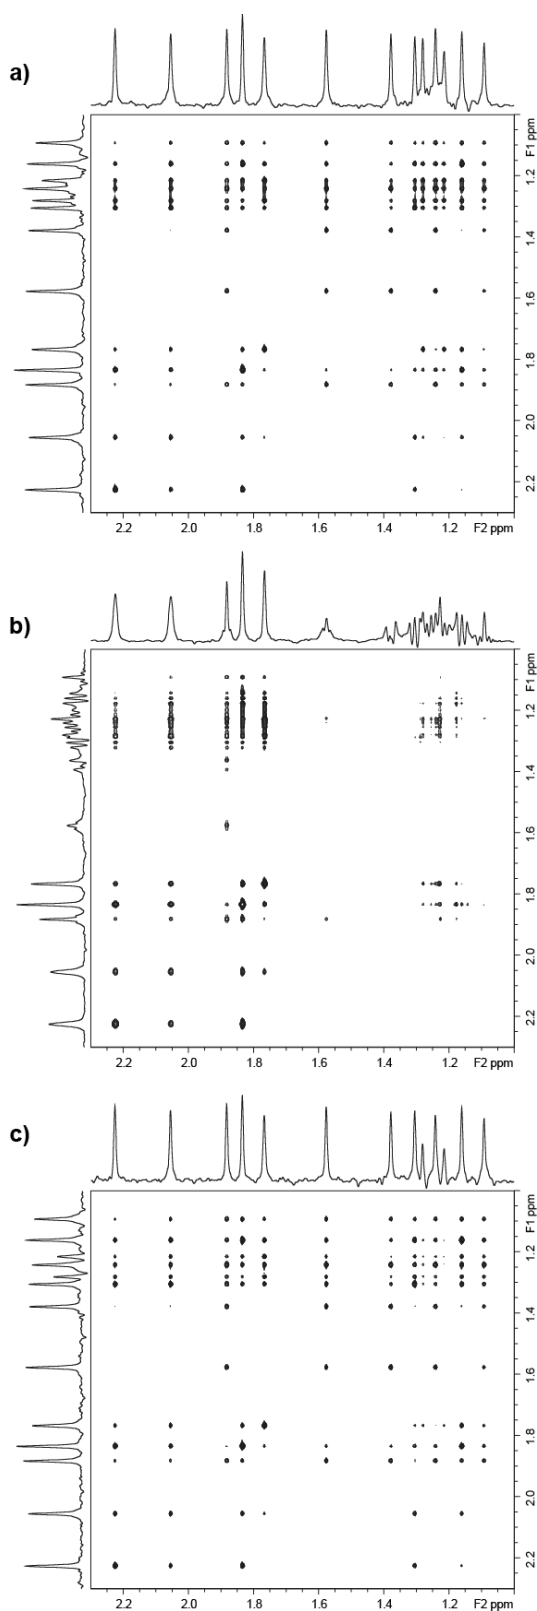

**Figure S7.** 2D spectra after covariance processing of (a)  $F_2$ -PSYCHE-TOCSY and (b) and (c)  $F_2$ -ZS-TOCSY of a sample of estradiol in DMSO- $d_6$ . Spectra were acquired using the pulse sequences described in Figure S5.  $F_2$ -ZS-TOCSY spectra were acquired using an rsnob pulse of duration 12 ms and RF amplitude 195 Hz for (b) and duration 50 ms with RF amplitude 47 Hz for (c). (c) has a vertical scale magnification of 5.5x relative to (a) and (b). Note the spurious responses in (b) and (c).

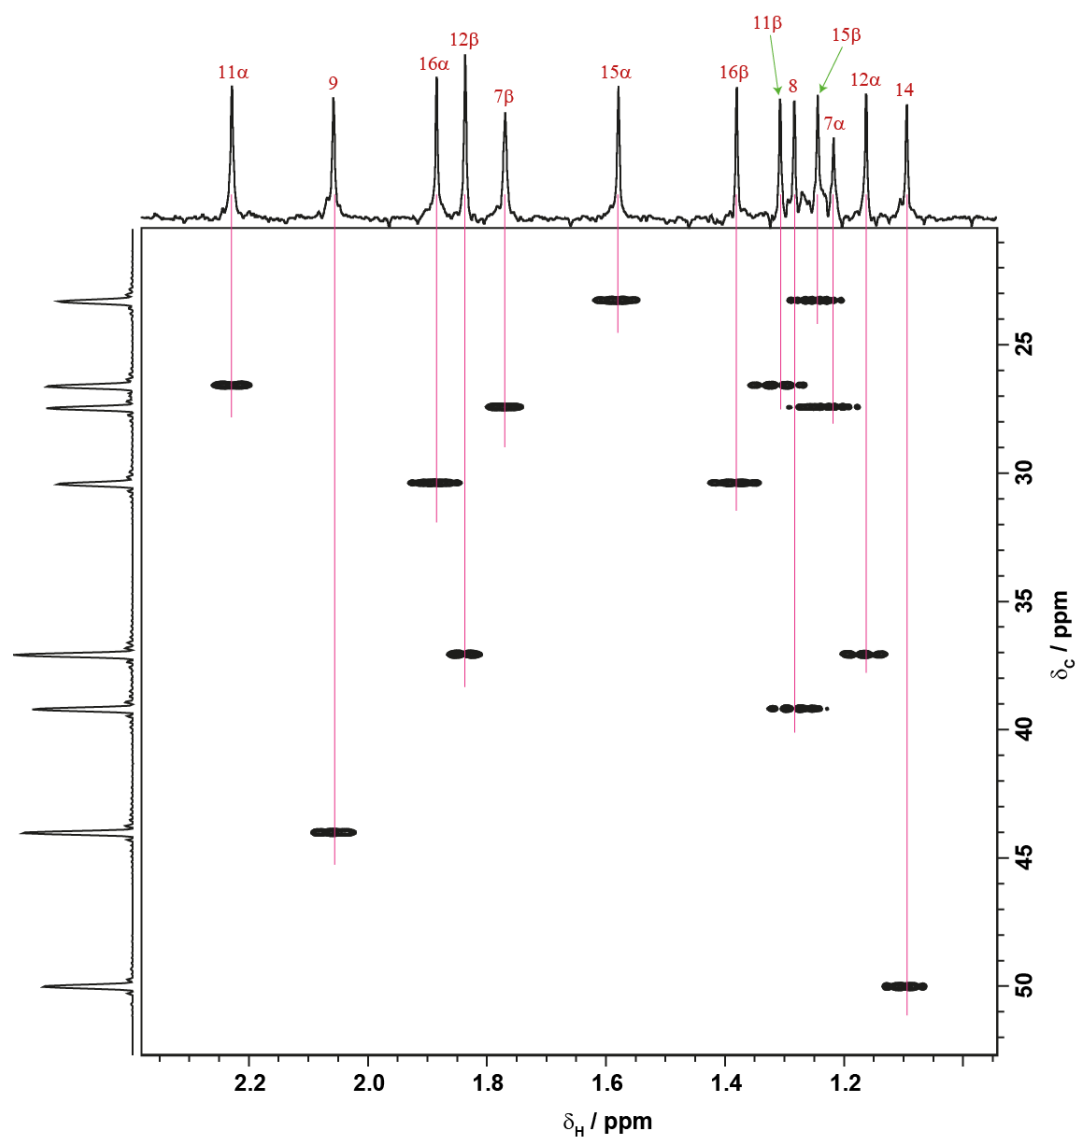

**Figure S8.**  $^1\text{H}$ - $^{13}\text{C}$  HSQC spectrum of a sample of estradiol in  $\text{DMSO-}d_6$ . To verify the accuracy of the chemical shifts observed in the PSYCHE experiment, a 1D PSYCHE pure shift spectrum is shown above the  $^1\text{H}$ - $^{13}\text{C}$  HSQC spectrum along  $F_2$ . Chemical shift changes due to second order isotope effects are too small to be seen in this comparison.

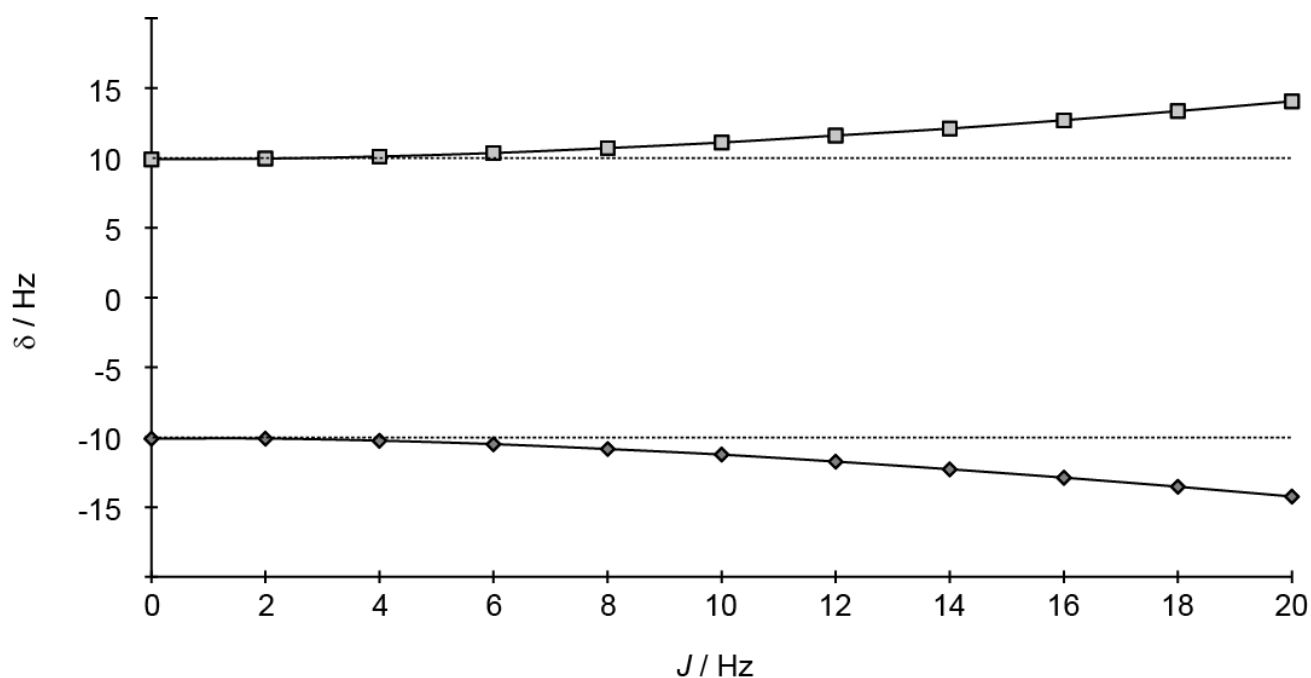

**Figure S9.** Apparent chemical shifts found by simulation of a strongly coupled AB spin system on application of the PSYCHE pulse sequence. The observed chemical shifts of the pure shift signals (squares and diamonds) for the two spins were calculated as a function of  $J$ . Their real chemical shifts (dashed lines) are shown for comparison. The calculation used a model AB spin system with  $\Delta\delta = 20$  Hz. Calculations were performed using the NMRSIM program in Bruker Topspin 3.2. Parameters for the PSYCHE pulse sequence were taken from Figure 1a in the manuscript, except that the program used does not include the effect of a field gradient pulse during the PSYCHE chirp pulse element.



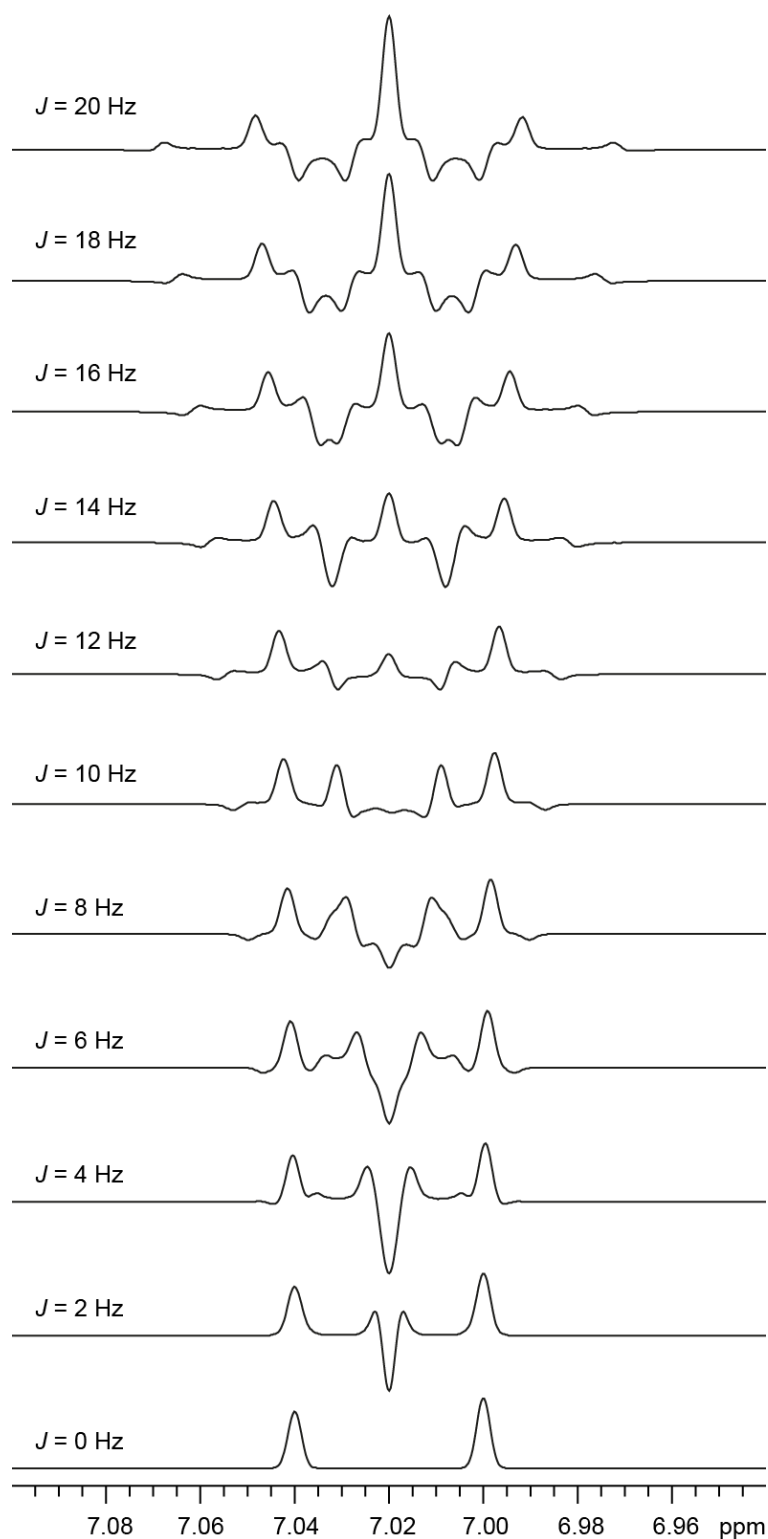

**Figure S10.** Simulated PSYCHE spectra of an AB system from which the values in Figure S9 were obtained. In a real experiment a pulsed field gradient during the PSYCHE element, omitted in these calculations, would result in attenuation of the strong coupling artifacts which appear at the average of the two chemical shifts.

### *Pulse sequence code*

**;psyche\_tocsyzqs\_f1.mf**

;F1 decoupled TOCSY using PSYCHE  
;With DIPSI and ZQF

; Mohammadali Foroozandeh  
; University of Manchester  
; (26/11/2013)  
; Avance II+/III Version

#include <Avance.incl>  
#include <Delay.incl>  
#include <Grad.incl>

"p2=2\*p1"  
"d0=0u"  
"in0=inf1/2"  
"FACTOR1=(d9/(p6\*115.112))/2+0.5"  
"l1=FACTOR1\*2"  
"d12=20u"  
"p20=p10"  
"p21=p11"  
"p22=p12"

1 ze  
2 d1  
3 d12 pl1:f1  
p1 ph1  
d0  
50u UNBLKGRAD  
p16:gp1  
d16  
p2 ph5  
50u  
p16:gp1  
d16  
p17:gp2  
d17  
10u pl0:f1  
d16  
(center (p20:gp10) (p10:sp10 ph6):f1 )  
d16  
10u pl1:f1  
p17:gp2  
d17  
d0  
p1 ph2  
5u pl0:f1  
( center (p21:gp11) (p11:sp1 ph4):f1 )  
d17  
5u pl10:f1  
4 p6\*3.556 ph23  
p6\*4.556 ph25  
p6\*3.222 ph23  
p6\*3.167 ph25  
p6\*0.333 ph23  
p6\*2.722 ph25  
p6\*4.167 ph23  
p6\*2.944 ph25  
p6\*4.111 ph23  
  
p6\*3.556 ph25  
p6\*4.556 ph23  
p6\*3.222 ph25  
p6\*3.167 ph23  
p6\*0.333 ph25  
p6\*2.722 ph23  
p6\*4.167 ph25  
p6\*2.944 ph23  
p6\*4.111 ph25  
  
p6\*3.556 ph25  
p6\*4.556 ph23

```

p6*3.222 ph25
p6*3.167 ph23
p6*0.333 ph25
p6*2.722 ph23
p6*4.167 ph25
p6*2.944 ph23
p6*4.111 ph25

p6*3.556 ph23
p6*4.556 ph25
p6*3.222 ph23
p6*3.167 ph25
p6*0.333 ph23
p6*2.722 ph25
p6*4.167 ph23
p6*2.944 ph25
p6*4.111 ph23
lo to 4 times l1

5u pl0:f1
p18:gp3
d17
( center (p22:gp12) (p12:sp2 ph4):f1 )
d17
50u BLKGRAD
5u pl1:f1
p1 ph3
go=2 ph31
d1 mc #0 to 2 F1PH(ip1, id0)
exit

ph1= 0 2
ph2= 0
ph3= 0
ph4= 0
ph5= 0
ph6= 0 0 1 1 2 2 3 3
ph23=3
ph25=1
ph31=0 2 2 0 0 2 2 0

;p1: high power 90 pulse width
;p2: high power 180 pulse width
;p6 : 90 degree low power pulse
;p10: duration of PSYCHE chirp element
;p11: duration ZQ suppression chirp pulse
;p12: duration ZQ suppression chirp pulse
;p20: duration of PSYCHE gradient
;p21: duration ZQ suppression gradient
;p22: duration ZQ suppression gradient
;p16: duration of CTP gradient
;p17: duration of CTP gradient
;p18:duration of homospoil gradient
;p1: f1 channel - power level for pulse (default)
;pl10: 120 dB
;pl10: DIPSI-2 power
;sp1: selective pulse power level
;spoffs1: selective pulse offset (0 Hz)
;spnam1: file name for selective pulse
;sp2: selective pulse power level
;spoffs2: selective pulse offset (0 Hz)
;spnam2: file name for selective pulse
;sp10: selective pulse power level
;spoffs10: selective pulse offset (0 Hz)
;spnam10: file name for selective pulse
;gpz1: CTP gradient 49%
;gpz2: CTP gradient 77%
;gpz3: CTP gradient 25%
;gpz10: psyche gradient 1-3 %
;gpz11: ZQS gradient 1-3%
;gpz12: ZQS gradient 1-3 %
;gpnam1: SINE.100
;gpnam2: SINE.100
;gpnam3: SINE.100

```

```
;gpnam10: SINE.100
;gpnam11: SINE.100
;gpnam12: SINE.100
;d0 : incremented delay
;d1 : relaxation delay
;d9 : TOCSY mixing time
;d16: gradient stabilisation delay
;d17: gradient stabilisation delay
;l1 : loop for DIPSI cycle
;in0 :  $1/(2 * SW) = DW$ 
;NS : number of scans
;DS : number of dummy scans
;td1 : number of t1 increments
;MC2 : TPPI
```
